# Supplementary material for: Ginkgo Biloba Extract Reduces Cardiac and Brain Inflammation in Rats Fed a HFD and Exposed to Chronic Mental Stress through NF-κB Inhibition
Source: Hindawi journal article supplement (doi:10.1155/2022/2408598), 2022-05-29

Supplementary figure 1

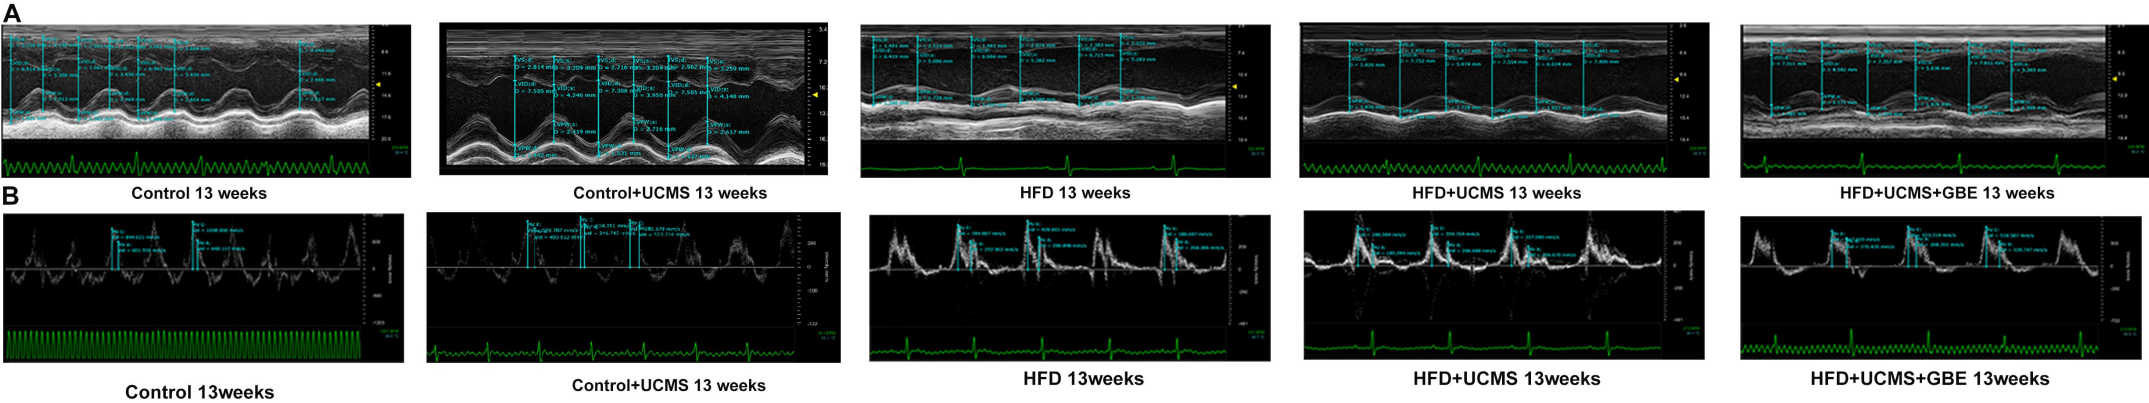

Supplement: f1 [file 2408598.f1.pdf]
